# Supplementary material for: Mediation of water-soluble oligoaniline by phenol in the aniline–persulfate system under alkaline conditions
Source: Royal Society of Chemistry journal article supplement (doi:10.1039/d1cp05983a), 2022-01-01
Supplement: d1cp05983a1.pdf [file d1cp05983a1.pdf]

## Supplementary Information

### Mediation of water-soluble oligoaniline by phenol in the aniline-persulfate system under alkaline conditions

Jing Xiao<sup>a</sup>, Cong Wang<sup>b,1</sup>, Bai-Qi Feng<sup>a</sup>, Tian-Yu Liu<sup>c</sup>, Shao-Yi Jia<sup>a</sup>, Hai-Tao Ren<sup>d</sup>, Yong Liu<sup>c</sup>, Song-Hai  
Wu<sup>a\*</sup>, Xu Han<sup>a\*</sup>

<sup>a</sup> *Tianjin Key Laboratory of Chemical Process Safety and Equipment Technology, School of Chemical Engineering and Technology, Tianjin University, Tianjin 300350, P.R. China*

<sup>b</sup> *School of Safety Supervision, North China Institute of Science and Technology, No. 467 academy Street, Sanhe Yanjiao Development Zone, Langfang 065201, P.R. China*

<sup>c</sup> *School of Chemistry and Chemical Engineering, Tianjin University of Technology, Tianjin 300384, P.R. China*

<sup>d</sup> *School of Textile Science and Engineering, Tiangong University, Tianjin 300387, P.R. China*

<sup>1</sup> *Equal contribution*

\*Corresponding Author:

Dr. Xu Han

Dr. Song-Hai Wu

Telephone: +86-15222072695 +86-13820888127

E-mail address: [xuhan@tju.edu.cn](mailto:xuhan@tju.edu.cn), [wusonghai@tju.edu.cn](mailto:wusonghai@tju.edu.cn)

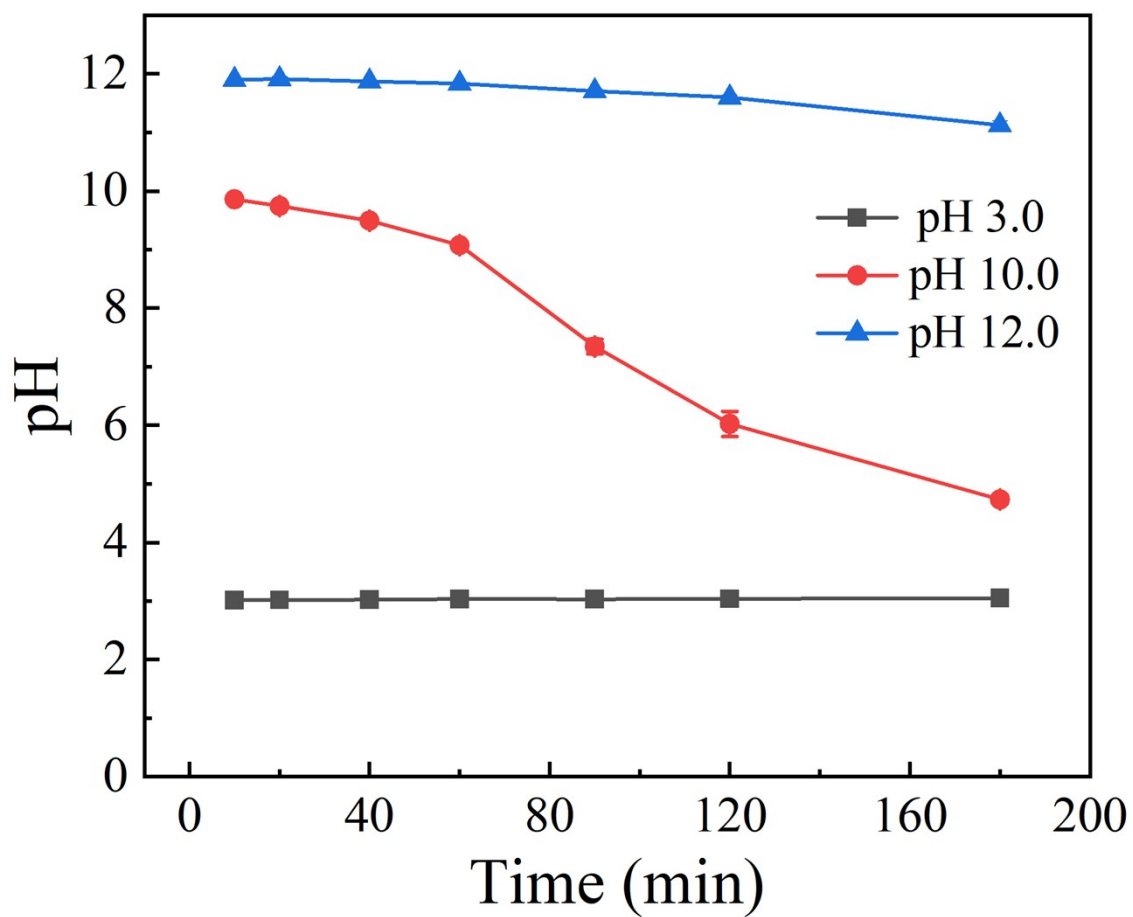

**Fig. S1.** pH variations in different reaction systems. Conditions: 2.0 mM aniline, 2.0 mM phenol and 5.0 mM SPS at  $\text{pH}_{\text{ini}}$  3.0, 10.0 or 12.0.

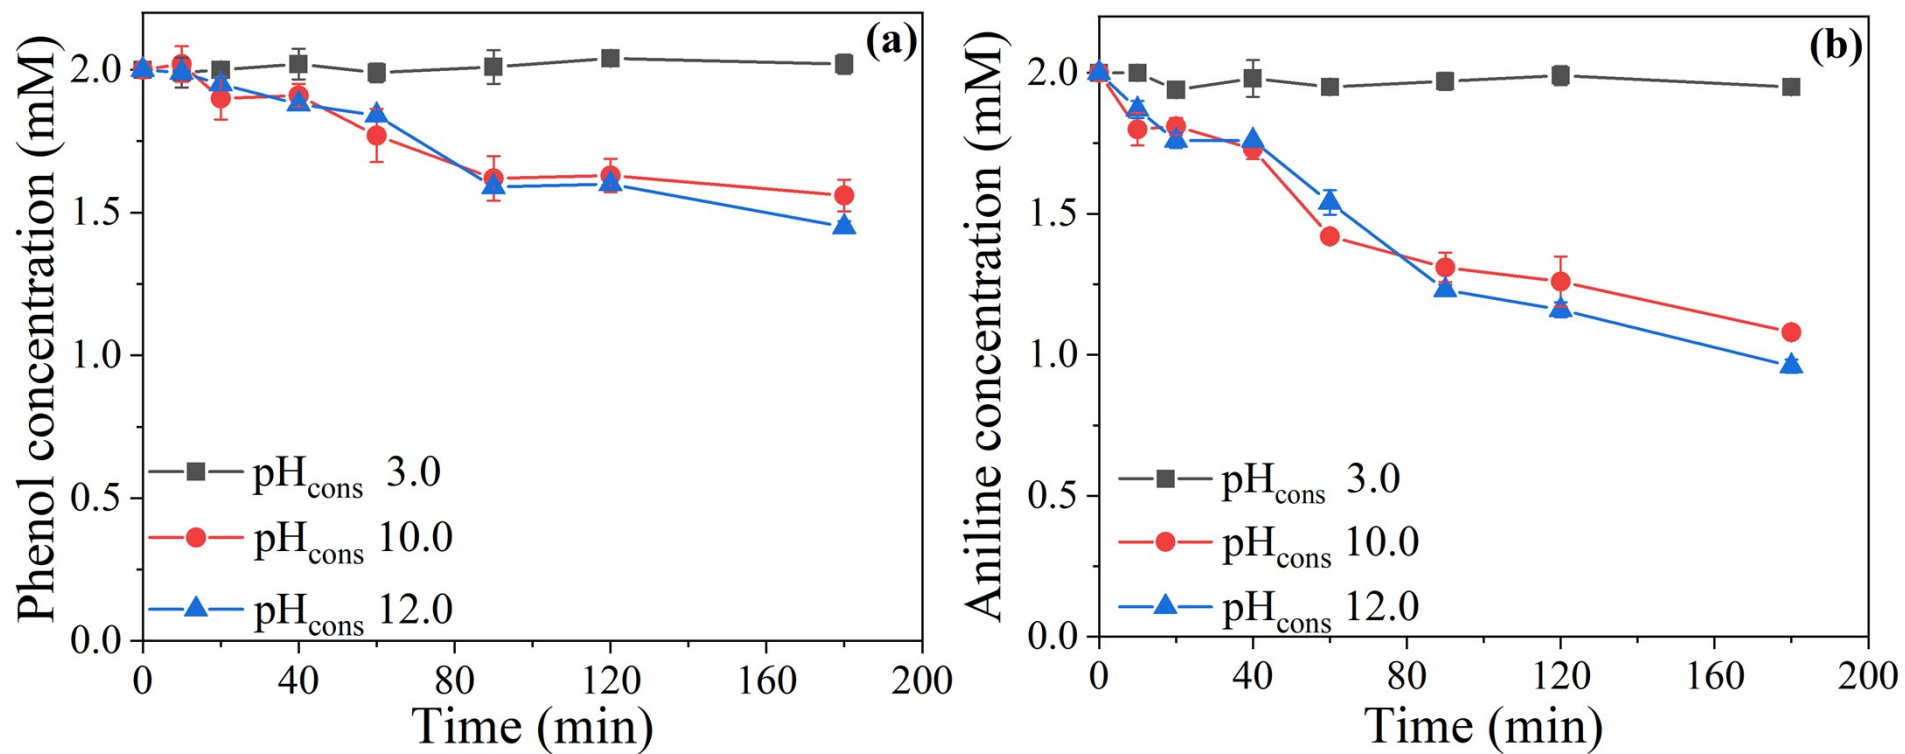

**Fig. S2.** Variations of phenol/aniline in the phenol-aniline-PS system at different  $\text{pH}_{\text{cons}}$  values. (a) Variations of phenol, (b) Variations of aniline. Conditions: 2.0 mM aniline, 2.0 mM phenol and 5.0 mM SPS.

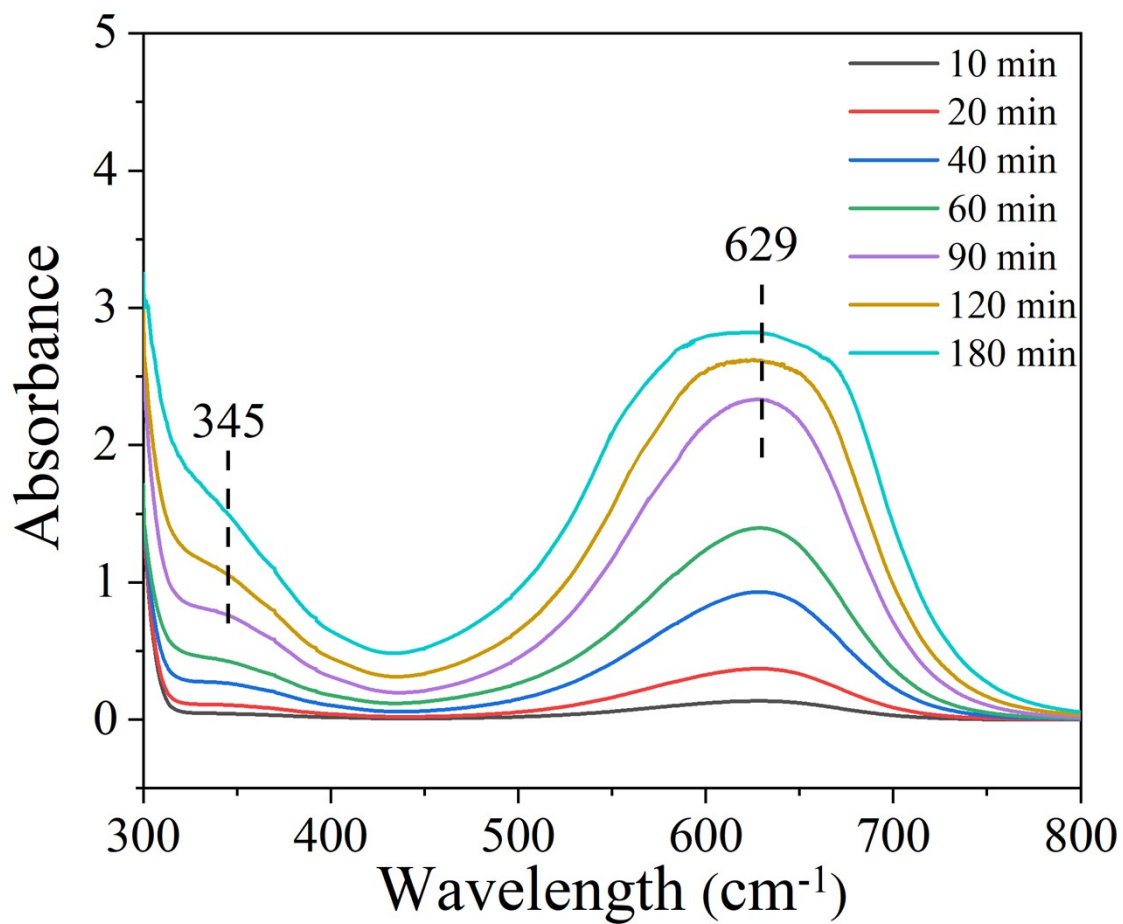

**Fig. S3.** UV-vis spectra of the oxidation products in the phenol-aniline-SPS system at  $\text{pH}_{\text{cons}}$  10.0.

Conditions: 2.0 mM aniline, 2.0 mM phenol and 5.0 mM SPS.

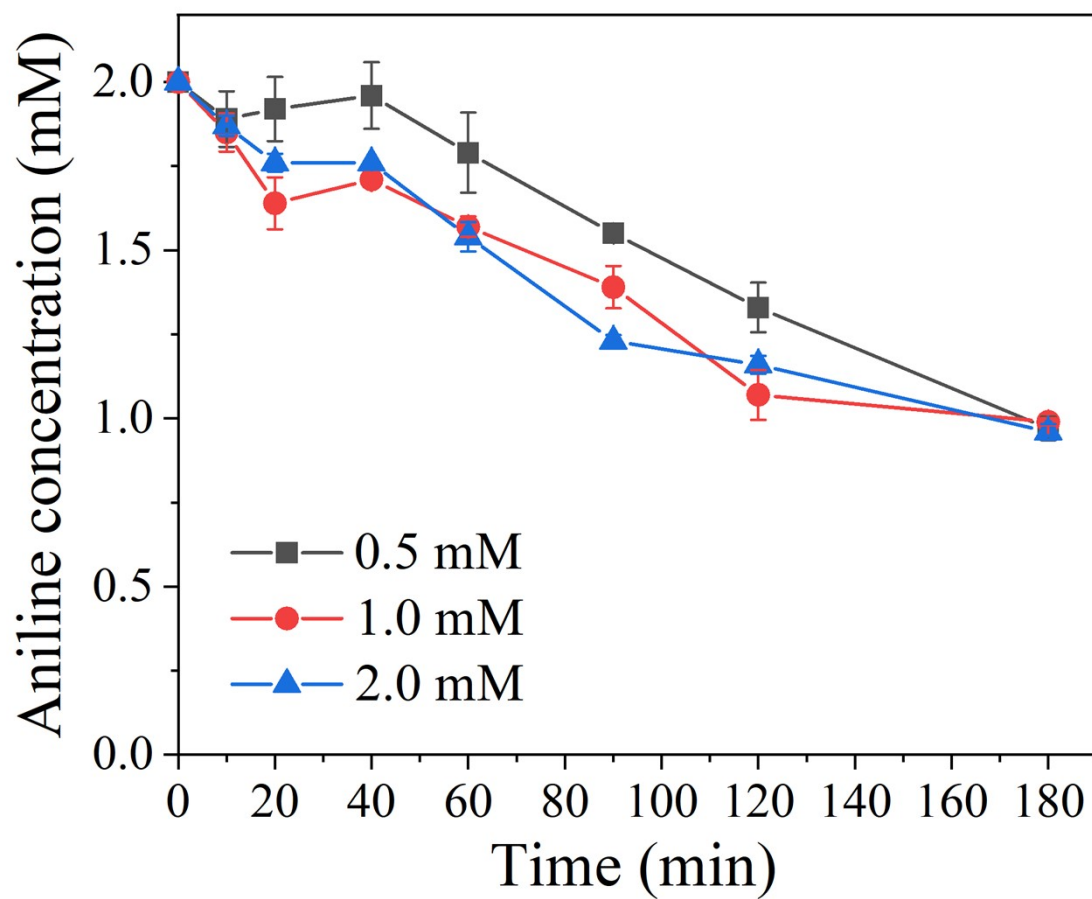

**Fig. S4.** Variations of aniline in the presence of different concentrations of phenol in the phenol-aniline-SPS system. Conditions: 2.0 mM aniline and 5.0 mM SPS at  $\text{pH}_{\text{cons}}$  12.0.

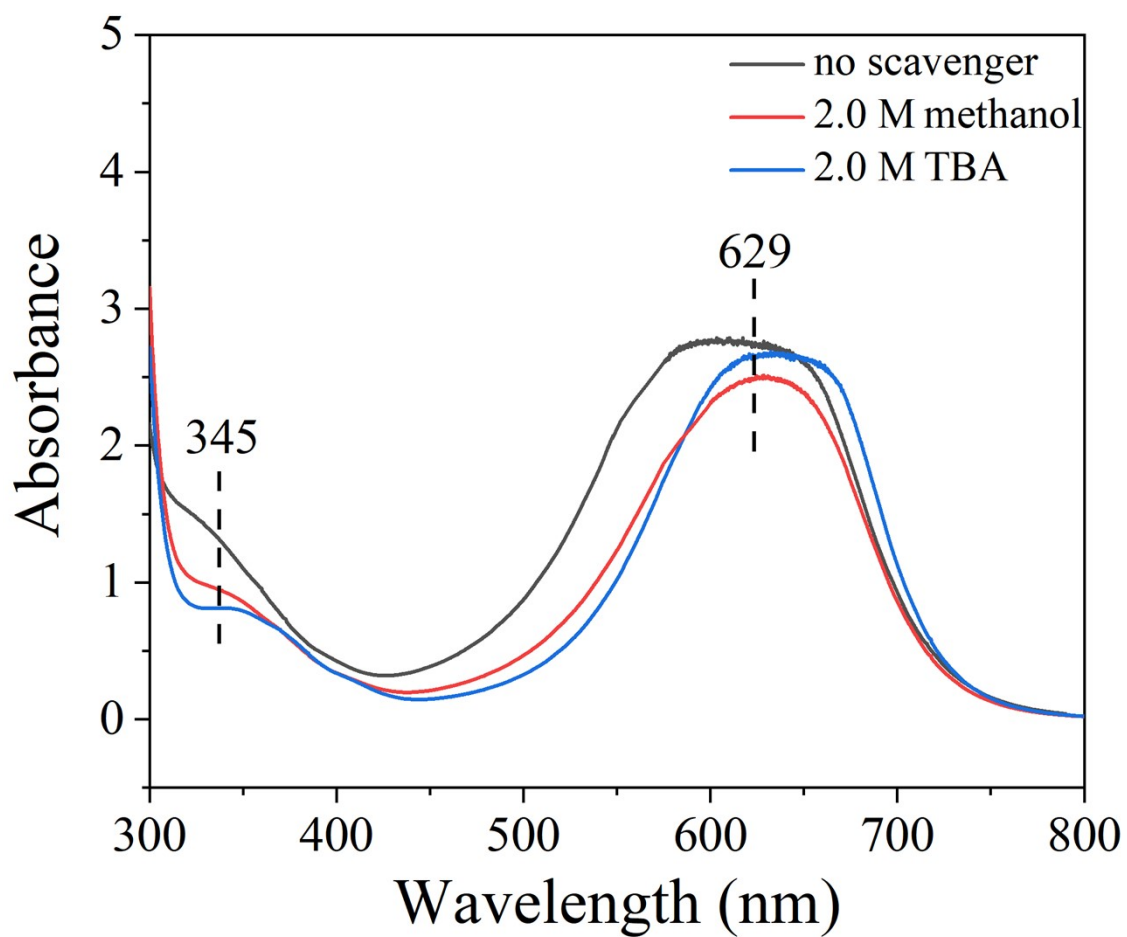

**Fig. S5.** Quenching experiments in the formation of OANI in the phenol-aniline-SPS system. Conditions: 2.0 mM aniline, 2.0 mM phenol and 5.0 mM SPS at  $\text{pH}_{\text{cons}}$  12.0 at 180 min.

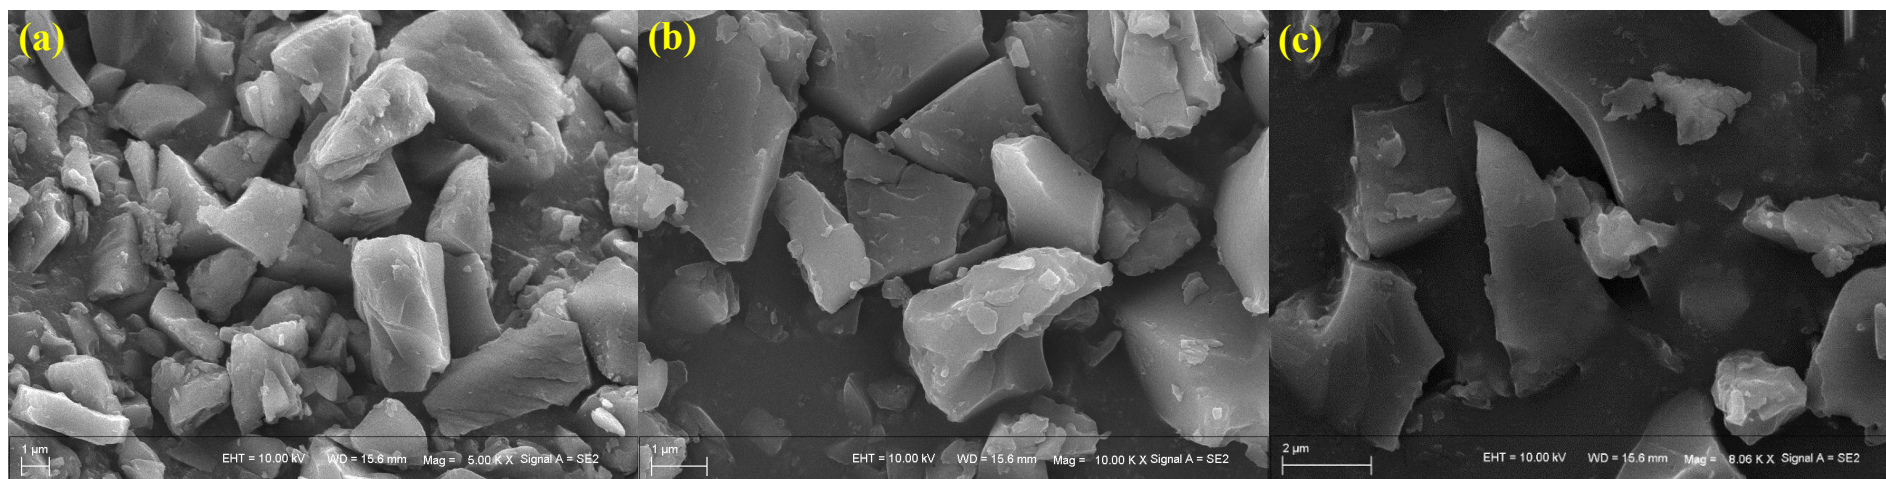

**Fig. S6.** SEM images of the oxidation products in the phenol-aniline-SPS system in the presence of different concentrations of phenol. (a) 0.5 mM phenol (OANIs<sub>0.5</sub>), (b) 1.0 mM phenol (OANIs<sub>1.0</sub>) and (c) 2.0 mM phenol (OANIs<sub>2.0</sub>). Conditions: 2.0 mM aniline and 5.0 mM SPS at pH<sub>cons</sub> 12.0 at 180 min.

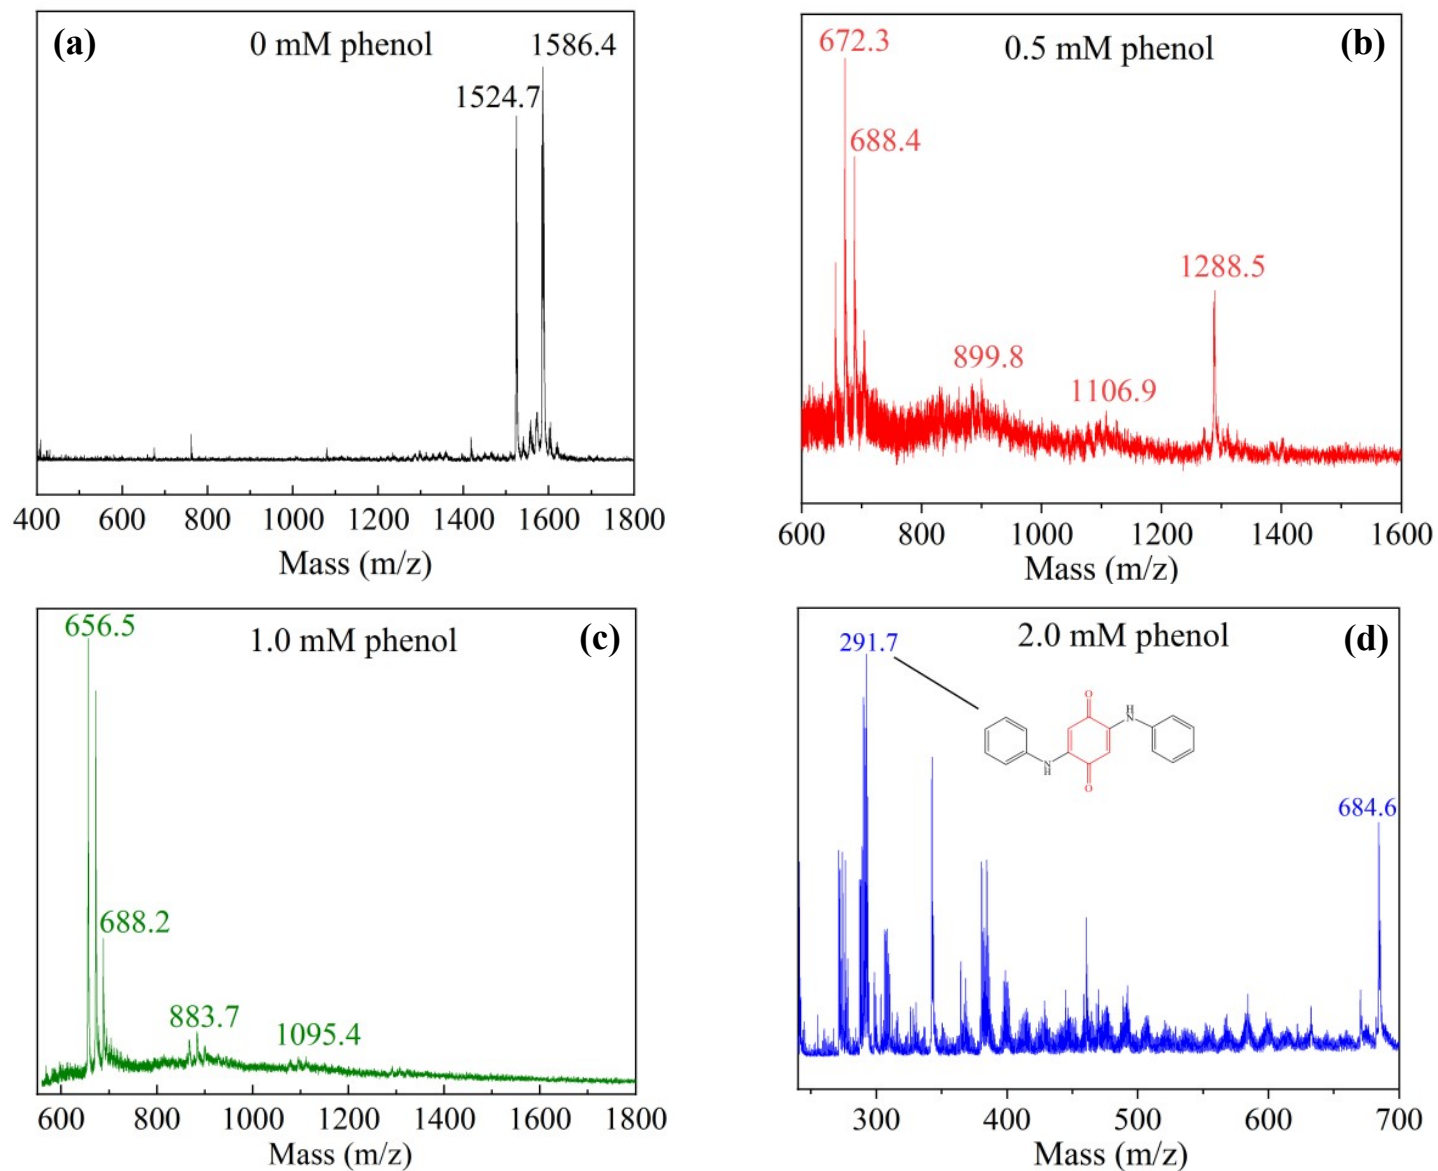

**Fig. S7.** MALDI-TOF analysis of the oxidation products of (a) OANI<sub>0</sub>, (b) OANI<sub>0.5</sub>, (c) OANI<sub>1.0</sub> and (d) OANI<sub>2.0</sub>.



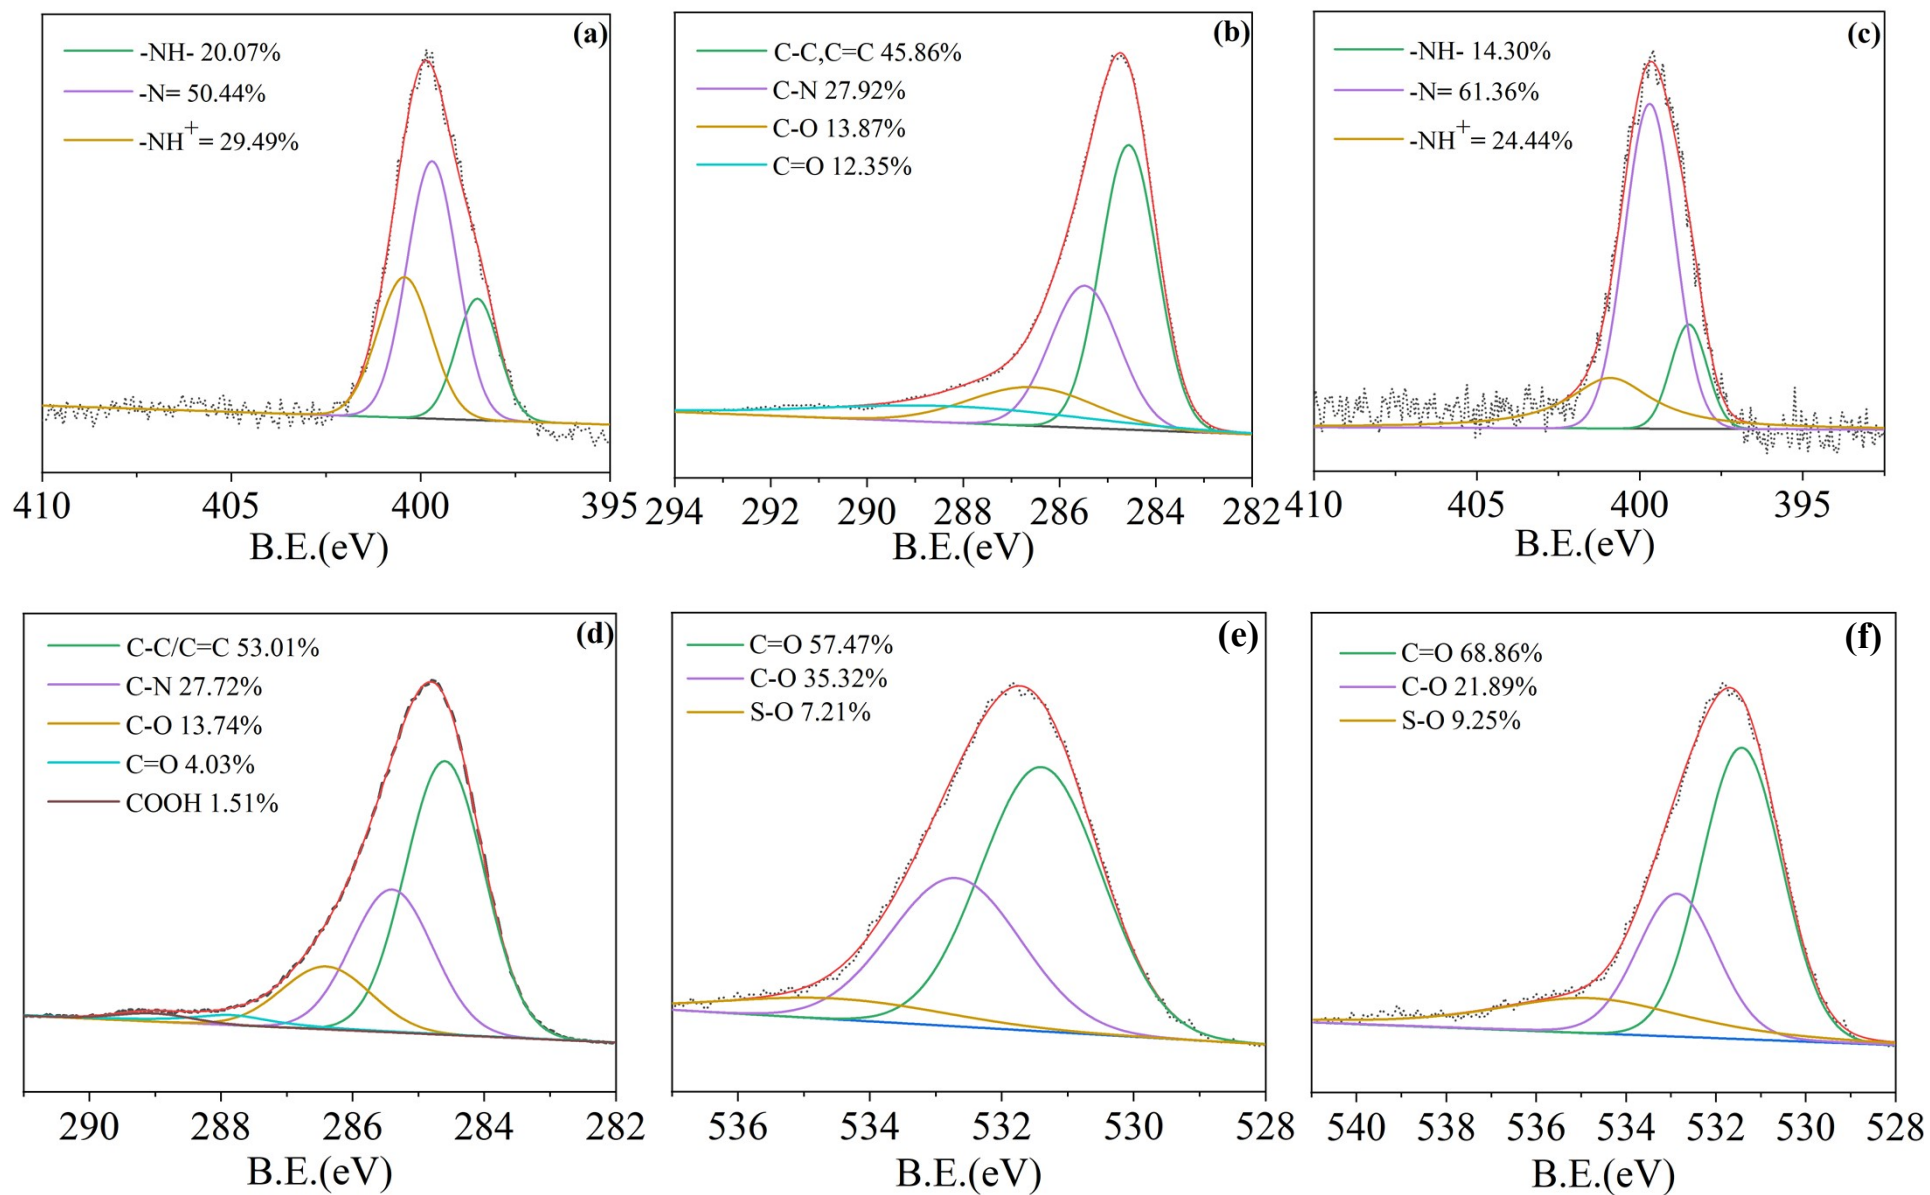

**Fig. S8.** XPS spectra of (a) N 1s of OANIs<sub>0</sub>, (b) C 1s of OANIs<sub>0</sub>, (c) N 1s of OANIs<sub>2.0</sub>, (d) C 1s of OANIs<sub>2.0</sub>, (e) O 1s of OANIs<sub>0</sub> and (f) O 1s of OANIs<sub>2.0</sub>.

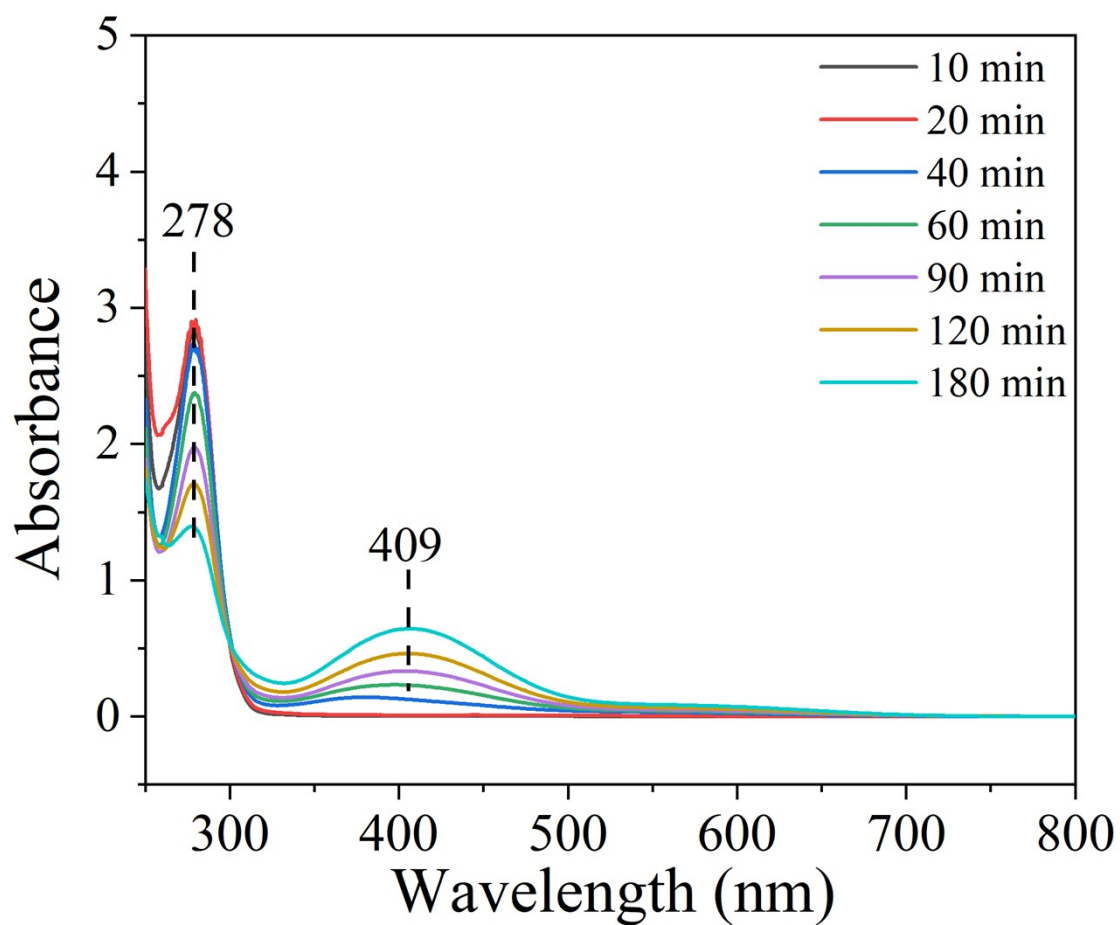

**Fig. S9.** UV-vis spectra of the oxidation products of aniline by SPS in the absence of phenol. Conditions: 2.0 mM aniline and 5.0 mM SPS at  $\text{pH}_{\text{cons}}$  10.0.

PhNH•-phenol :

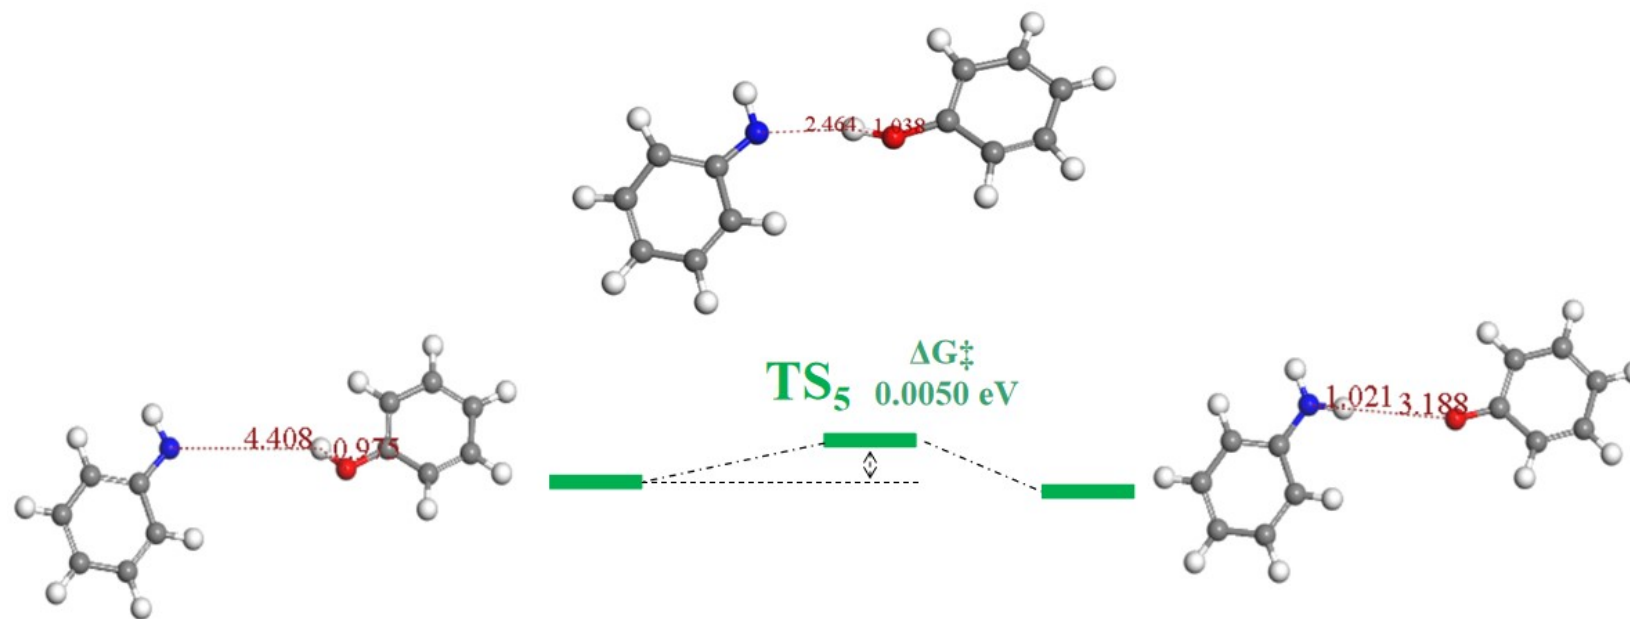

Fig. S10. DFT calculations of the bond length and the energy barriers in the reaction between PhNH• and phenol.

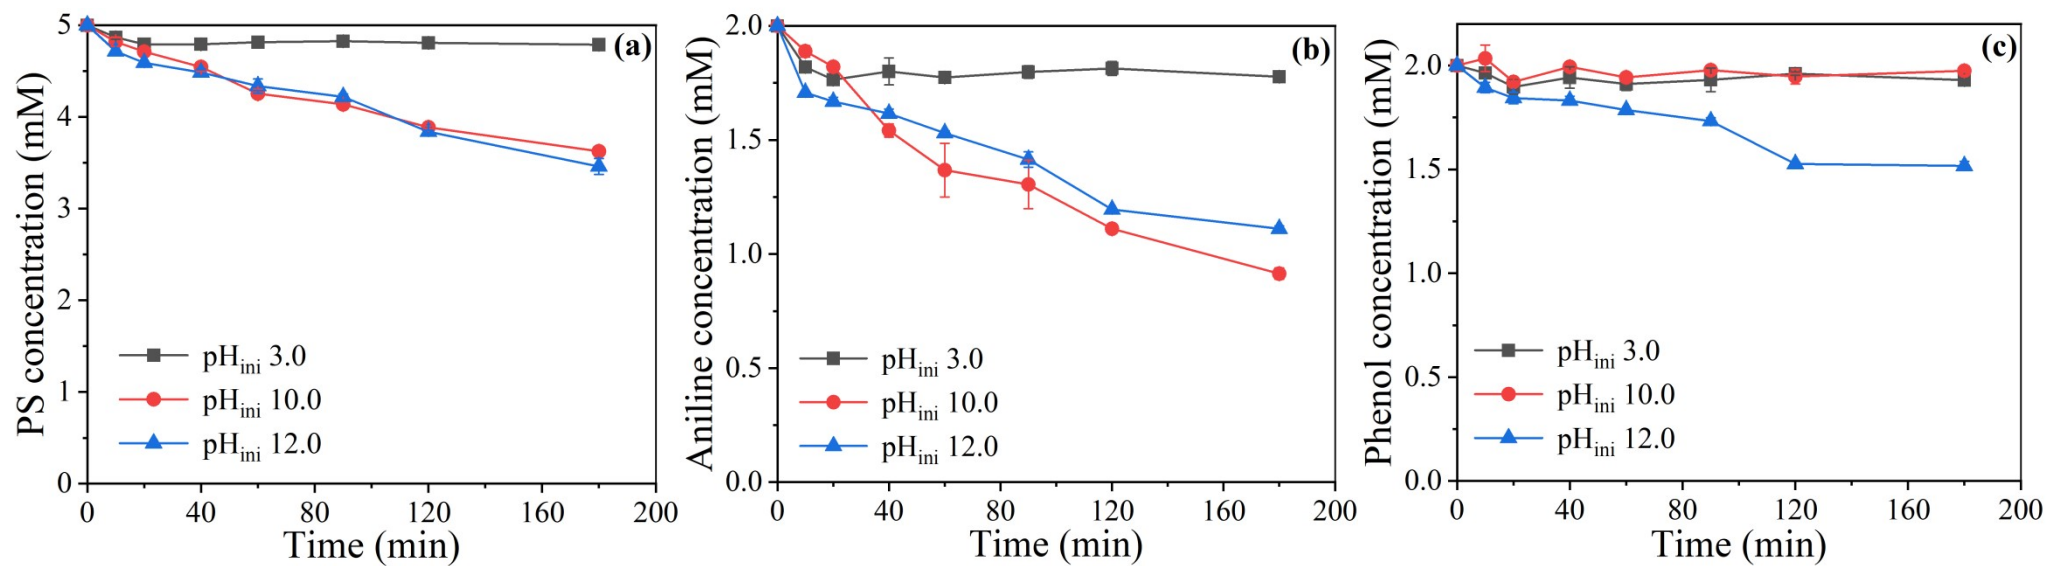

**Fig. S11.** Variations of (a) SPS, (b) aniline and (c) phenol in the phenol-aniline-SPS system at different  $\text{pH}_{\text{ini}}$  values. Conditions: 2.0 mM aniline, 2.0 mM phenol and 5.0 mM SPS.

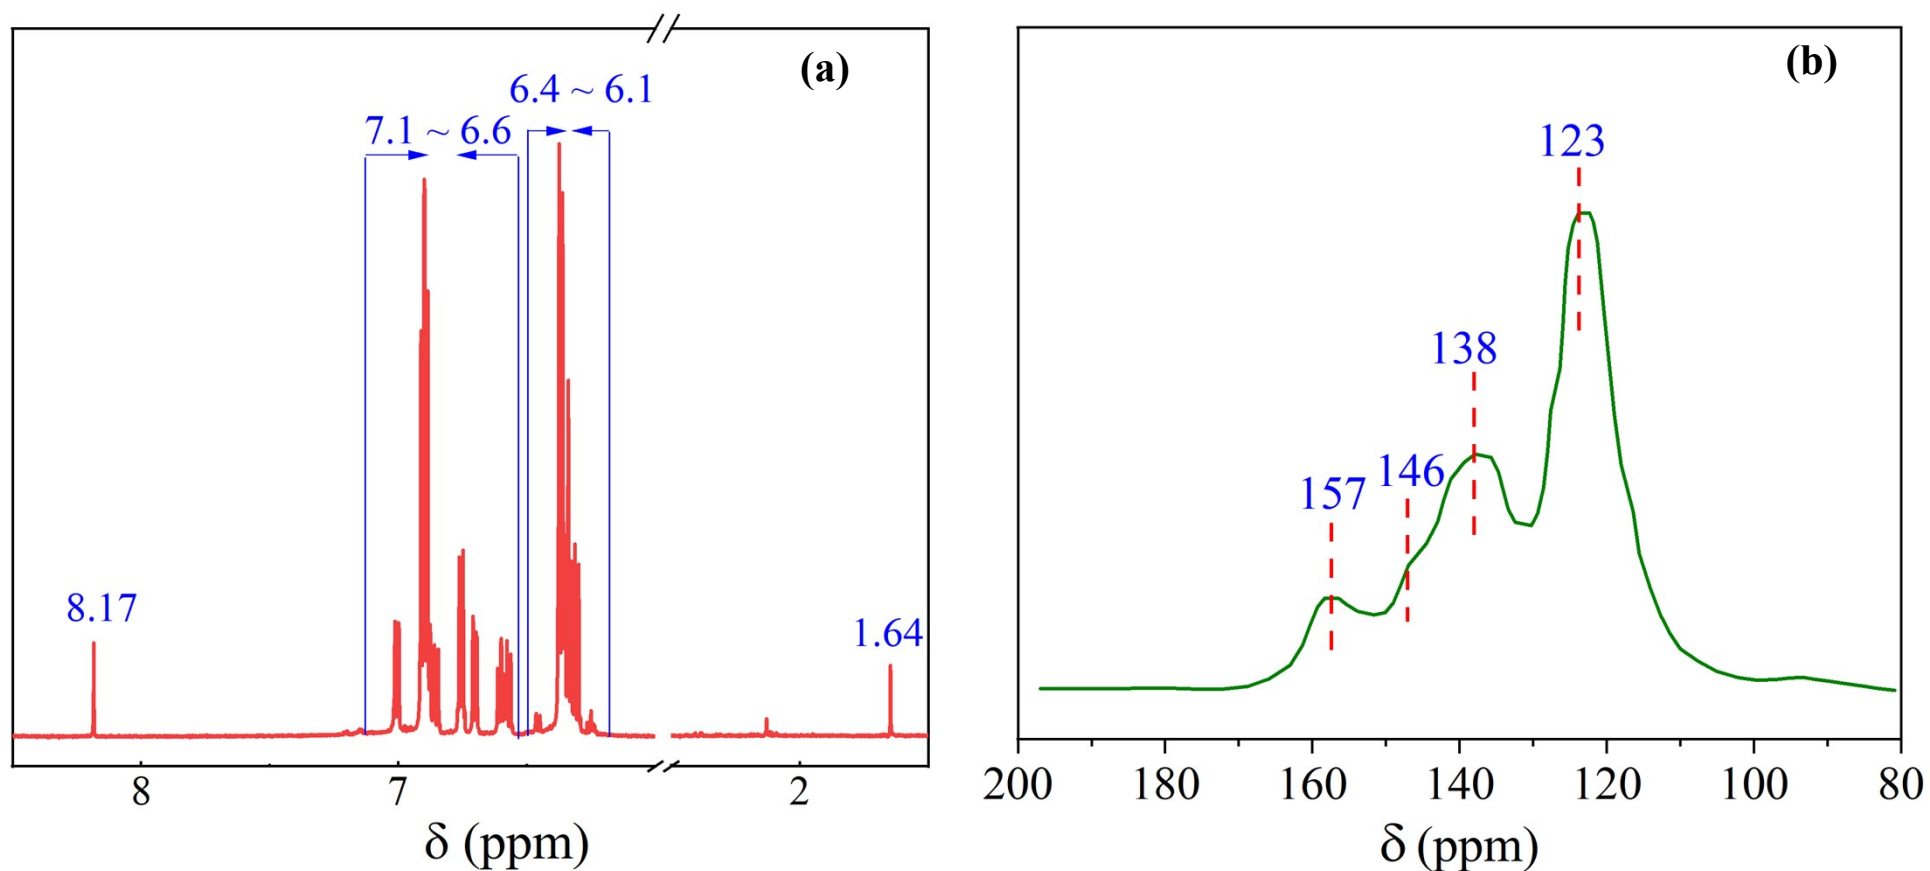

**Fig. S12.** The (a)  $^1\text{H-NMR}$  and (b)  $^{13}\text{C-NMR}$  spectrum spectroscopy of OANIS<sub>2.0</sub>.

Fig. S12(a) also provides  $^1\text{H-NMR}$  spectroscopy of the OANIS<sub>2.0</sub> and the signal at 1.64 ppm indicates the presence of methylene or alkane groups in the oxidation products.<sup>1</sup> The signals in the range of 6.1-6.4 ppm are assigned to alkenes in the benzoquinone or benzoquinone monoimine moieties.<sup>2</sup> The signals in the range of 6.6-7.1 ppm represent aromatics.<sup>2</sup> The 8.17 ppm weak signal indicates the presence of the nitrogen-bonded hydrogens,<sup>2</sup> and the hydrogen signal of N-H is weakened upon D<sub>2</sub>O exchange.<sup>3</sup> Fig. S12(b) shows the  $^{13}\text{C-NMR}$  spectrum of the OANIS<sub>2.0</sub>. The signal at 123 ppm is assigned not only to the carbon skeleton of the benzenoid-quinoid structure, but also to the amine structure.<sup>4</sup> Two signals at 138 and 146 ppm (shoulder) correspond to the two non-proton-

bonded carbons in the phenylene ring of the amine repeating unit and the four proton-bonded carbons in the quinoid ring, respectively.<sup>4</sup> The signal at 157 ppm represents the two non-proton bonded carbons in the quinoid ring.<sup>4</sup> The signals at 123, 138, 146 and 157 ppm in C-13 NMR spectrum of the produced OANIs<sub>2.0</sub> are similar to the signals at 124.5, 137.5, 148 and 158 ppm of PANI, reported previously (Hjertberg et al.),<sup>5</sup> indicating that OANIs<sub>2.0</sub> is composed of benzene rings and quinoid rings.

## References

1. C. Wang, S. Jia, Y. Zhang, Y. Nian, Y. Wang, Y. Han, X. Han, Catalytic reactivity of  $\text{Co}_3\text{O}_4$  with different facets in the hydrogen abstraction of phenol by persulfate. *Applied Catalysis B: Environmental*. 2020, **270**, 118819.
2. D.C. Ferreira, J.R. Pires, M.L. Temperini, Spectroscopic characterization of oligoaniline microspheres obtained by an aniline–persulfate approach. *The Journal of Physical Chemistry B*. 2011, **115(6)**, 1368-1375.
3. E. Rebourt, J.A. Joule, A.P. Monkman, Polyaniline oligomers; synthesis and characterisation. *Synthetic Metals*, 1997, **84(1-3)**, 65-66.
4. T. Hagiwara, M. Yamaura, K. Iwata. Structural analysis of deprotonated polyaniline by solid-state  $^{13}\text{C}$  NMR, *Synthetic metals*, 1988, **26(2)**, 195-201.
5. T. Hjertberg, W.R. Salaneck, I. Lundstrom, N.L.D. Somasiri, A.G. MacDiarmid, A  $^{13}\text{C}$  CP-MAS NMR investigation of polyaniline. *Journal of Polymer Science: Polymer Letters Edition*, 1985, **23(10)**: 503-508.
